# Supplementary material
Source: PubMed Central journal article supplement (PMC4359961)

**Figure S1:** Immunostaining for vimentin (green), cytokeratin (red), and DNA (blue) in isolated  $\beta$ 1-floxed cells.

**Figure S2:** Flow cytometry histograms for integrin  $\alpha$  subunits.

**Figure S3:** Relationship between total traction force and cell area showing linear regression fits.

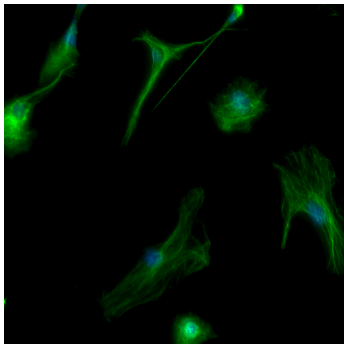

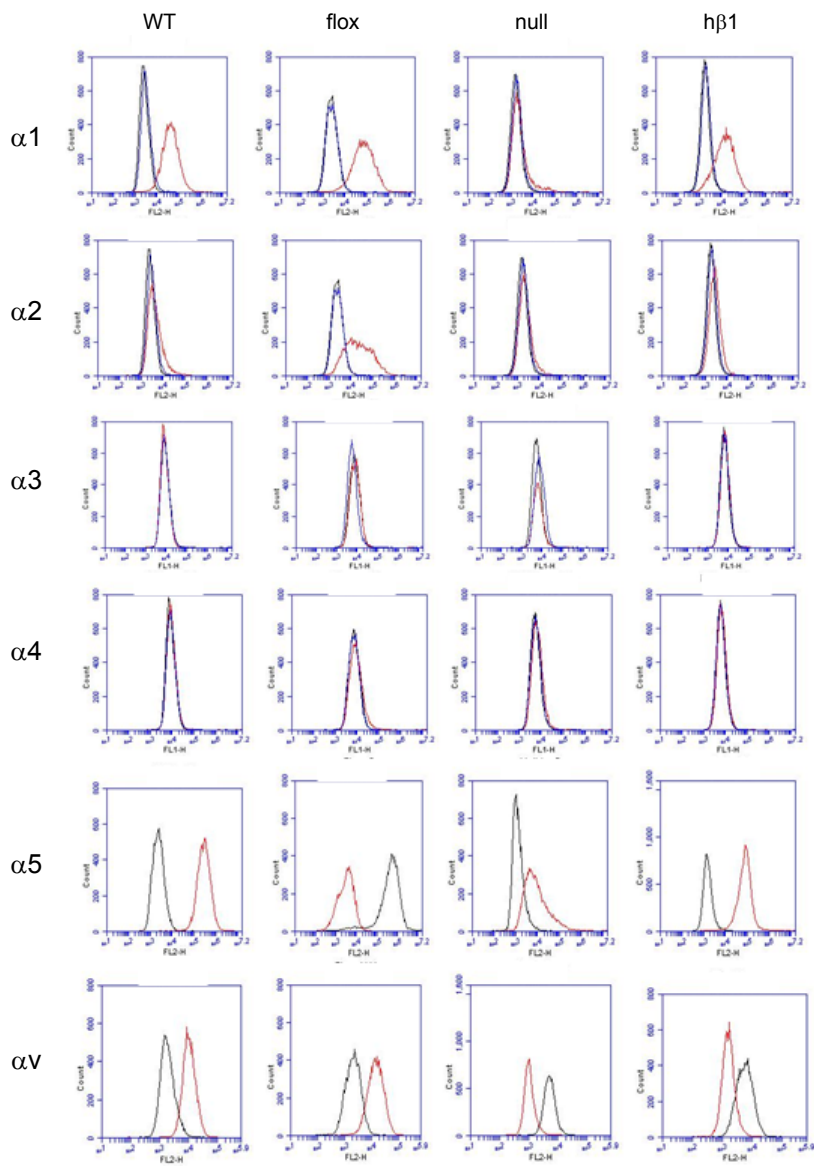

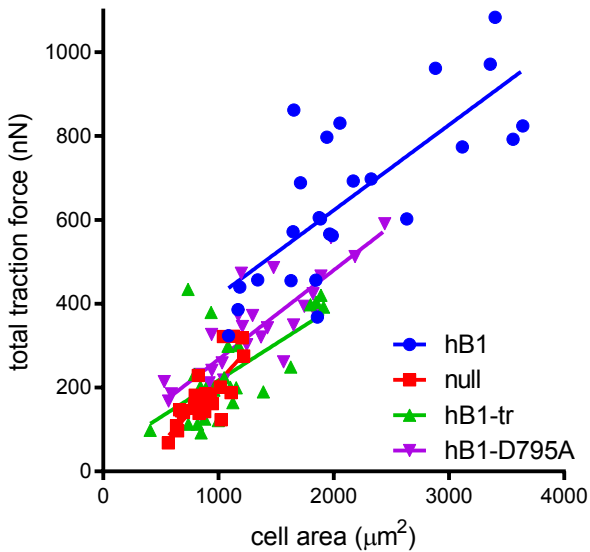

Supplement: NIHMS645477-supplement.pdf [file NIHMS645477-supplement.pdf]
